# Supplementary material
Source: publisher figshare collection journal article supplement (https://sage.figshare.com/ndownloader/files/12968360)
Supplement: Supplementary file 1 [file 12968360]

Appendix A

Included Articles

Anderson, C. M. & Long, E. S. (2002). Use of a structured descriptive assessment methodology to identify variables affecting problem behavior. *Journal of Applied Behavior Analysis, 35,* 137-154. doi: 10.1901/jaba.2002.35-137

Arndorfer, R. E., Miltenberger, R. G., Woster, S. H., Rortvedt, A. K., & Gaffaney, T. (1994). Home-based descriptive and experimental analysis of problem behaviors in children. *Topics in Early Childhood Special Education, 14*, 64-87. doi: 10.1177/027112149401400108

Athens, E. S., & Vollmer, T. R. (2010). An investigation of differential reinforcement of alternative behavior without extinction. *Journal of Applied Behavior Analysis, 43*, 569-589. doi: 10.1901/jaba.2010.43-569

Austin, J. E., & Tiger, J. H. (2015). Providing alternative reinforcers to facilitate tolerance to delayed reinforcement following functional communication training. *Journal of Applied Behavior Analysis, 48*, 663-668. doi: 10.1002/jaba.215

Badgett, N., & Falcomata, T. S. (2015). A comparison of methodologies of brief functional analysis. *Developmental Neurorehabilitation, 18*, 224-233. doi: 10.3109/17518423.2013.792298

Bailey, J., McComas, J. J., Benavides, C., & Lovascz, C. (2002). Functional assessment in a residential setting: Identifying an effective communicative replacement response for aggressive behavior. *Journal of Developmental and Physical Disabilities, 14*, 353-369. doi: 10.1023/A:1020382819146

Belfiore, P. J., Browder, D. M., &; Lin, C.-H. (1993). Using descriptive and experimental analyses in the treatment of self-injurious behavior. *Education and Training in Autism and Developmental Disabilities, 28,* 57-65.

Berg, W. K., Ringdahl, J. E., Ryan, S. E., Ing, A. D., Lustig, N., Romani, P., . . . Durako, E. (2015). Resurgence of mands following functional communication training. *Revista Mexicana de Análisis de la Conducta, 41*, 166-186. doi: 10.5514/rmac.v41.i2.63747

Berg, W. K., Wacker, D. P., Harding, J. W., Ganzer, J., & Barretto, A. (2007). An evaluation of multiple dependent variables across distinct classes of antecedent stimuli pre and post functional communication training. *Journal of Early and Intensive Behavior Intervention, 3-4*, 305-333. doi: [10.1037/h0100346](http://dx.doi.org/10.1037/h0100346)

Betz, A. M., Fisher, W. W., Roane, H. S., Mintz, J. C., & Owen, T. M. (2013). A component analysis of schedule thinning during functional communication training. *Journal of Applied Behavior Analysis, 46*, 219-241. doi: [10.1002/jaba.23](https://doi.org/10.1002/jaba.23)

Bird, F., & Dores, P. A., Moniz, D., & Robinson, J. (1989). Reducing severe aggressive and self-injurious behaviors with functional communication training. *American Journal on Intellectual and Developmental Disabilities, 94*, 37-48.

Boesch, M. C., Taber-Doughty, T., Wendt, O., & Smalts, S. S. (2015). Using a behavioral approach to decrease self-injurious behavior in an adolescent with severe autism: A data-based case study. *Education and Treatment of Children, 38*, 305-328. doi: [10.1353/etc.2015.0012](https://doi.org/10.1353/etc.2015.0012)

Borrero, C. S. W., & Vollmer, T. R. (2006). Experimental analysis and treatment of multiply controlled problem behavior: A systematic replication and extension. *Journal of Applied Behavior Analysis, 39,* 375–379. doi: 10.1901/jaba.2006.170-04

Bowman, L. G., Fisher, W. W., Thompson, R. H., & Piazza, C. C. (1997). On the relation of mands and the function of destructive behavior. *Journal of Applied Behavior Analysis, 30*, 251-265. doi: 10.1901/jaba.1997.30-251

Braithwaite, K. L., & Richdale, A. L. (2000). Functional communication training to replace challenging behaviors across two behavioral outcomes. *Behavioral Interventions, 15*, 21-36. doi: 10.1002/(SICI)1099-078X(200001/03)15:1<21::AID-BIN45>3.0.CO;2-#

Briggs, A. M., Akers, J. S., Greer, B. D., Fisher, W. W., & Retzlaff, B. J. (2017). Systematic changes in preference for schedule-thinning arrangements as a function of relative reinforcement density. *Behavior Modification, 42*, 472-497. doi: 10.1177/0145445517742883

Brown, K. A., Wacker, D. P., Derby, K. M., Peck, S. M., Richman, D. M., Sasso, G. M. … Harding, J. W. (2000). Evaluating the effects of functional communication training in the presence and absence of establishing operations. *Journal of Applied Behavior Analysis, 33*, 53-71. doi: 10.1901/jaba.2000.33-53

Buckley, S. D., & Newchok, D. K. (2005). Differential impact of response effort within a response chain on use of mands in a student with autism. *Research in Developmental Disabilities, 26*, 77-85. doi: 10.1016/j.ridd.2004.07.004

Buschbacher, P., Fox, L., & Clarke, S. (2004). Recapturing desired family routines: A parent-professional behavioral collaboration. *Research and Practice for Persons with Severe Disabilities, 29*, 25–39. doi: 10.2511/rpsd.29.1.25

Byiers, B. J., Dimian, A., & Symons, F. J. (2014). Functional communication training in Rett syndrome: A preliminary study. *American Journal on Intellectual and Developmental Disabilities, 119*, 340-350. doi: 10.1352/1944-7558-119.4.340

Call, N. A., & Lomas Mevers, J. E. (2014). The relative influence of motivating operations for positive and negative reinforcement on problem behavior during demands. *Behavioral Interventions, 29*, 4-20. doi: 10.1002/bin.1374

Campbell, R. V., & Lutzker, J. R. (1993). Using functional equivalence training to reduce severe challenging behavior: A case study. *Journal of Developmental and Physical Disabilities, 5*, 203-216. doi: 10.1007/BF01047064

Campos, C., Leon, Y., Sleiman, A., & Urcuyo, B. (2017). Further evaluation of the use of multiple schedules for behavior maintained by negative reinforcement. *Behavior Modification, 41,* 269-285. doi: 10.1177/0145445516670838

Carr, E. G., & Carlson, J. I. (1993). Reduction of severe behavior problems in the community using a multicomponent treatment approach. *Journal of Applied Behavior Analysis, 26*, 157-172. doi: 10.1901/jaba.1993.26-157

Carr, E. G., & Durand, V. M. (1985). Reducing behavior problems through functional communication training. *Journal of Applied Behavior Analysis, 18*, 111-26. doi: 10.1901/jaba.1985.18-111

Carr, E. G., Levin, L., McConnachie, G., Carlson, J. I., Kemp, D. C., Smith, C. E., & McLaughlin, D. M. (1999). Comprehensive multisituational intervention for problem behavior in the community: Long-term maintenance and social validation. *Journal of Positive Behavior Interventions, 1*, 5-25. doi: 10.1177/109830079900100103

Caruthers, C. E., Lambert, J. M., Chazin, K. M., Harbin, E. R., & Houchins-Juarez, N. J. (2015). Latency-based FA as baseline for subsequent treatment evaluation. *Behavior Analysis in Practice, 8*, 48-51. doi: 10.1007/s40617-015-0046-3

Casey, S. D., & Merical, C. L. (2006). The use of functional communication training without additional treatment procedures in an inclusive school setting. *Behavioral Disorders, 32*, 46-54. doi: 10.1177/019874290603200102

Chezan, L.C., Drasgow, E., & Martin, C.A. (2014). Discrete-trial functional analysis and functional communication training with three adults with intellectual disabilities and problem behavior. *Journal of Behavioral Education, 23*, 221-246. doi: 10.1007/s10864-013-9192-2

Dalmau, Y. C. P., Wacker, D. P., Harding, J. W., Berg, W. K., Schieltz, K. M., Lee, J. F., … Kramer, A. R. (2011). A preliminary evaluation of functional communication training effectiveness and language preference when Spanish and English are manipulated. *Journal of Behavioral Education, 20*, 233-251. doi: 10.1007/s10864-011-9131-z

Danov, S. E., Hartman, E., McComas, J. J., & Symons, F. J. (2010). Evaluation of two communicative response modalities for a child with autism and self-injury. *The Journal of Speech and Language Pathology – Applied Behavior Analysis, 5*, 70-79. doi: 10.1037/h0100263

Davis, D. H., Fredrick, L. D., Alberto, P. A., & Gama, R. (2012). Functional communication training without extinction using concurrent schedules of differing magnitudes of reinforcement in classrooms. *Journal of Positive Behavior Interventions, 14*, 162-172. doi: 10.1177/1098300711429597

Davis, T. N., Fuentes, L., & Durand, S. (2014). Examination of systematic durations of presession reinforcer access on functional communication training. *Journal of Developmental and Physical Disabilities, 26*, 263-270. doi: 10.1007/s10882-013-9360-2

Davis, T. N., O’Reilly, M. F., Kang, S., Rispoli, M., Lang, R. B., Machalicek, W. …Sigafoos, J. (2009). Impact of presession access to toys maintaining challenging behavior on functional communication training: A single case study. *Journal of Developmental and Physical Disabilities, 21*, 515-521. doi: 10.1007/s10882-009-9158-4

Day, H. M., Horner, R. H., O’Neill, R. E. (1994). Multiple functions of problem behaviors: Assessment and intervention. *Journal of Applied Behavior Analysis, 27*, 279–289. doi: 10.1901/jaba.1994.27-279

Day, R. M., Rea, J. A., Schussler, N. G., Larsen, S. E., & Johnson, W. L. (1988). A functionally based approach to the treatment of self-injurious behavior. *Behavior Modification, 12,* 565-589. doi: 10.1177/01454455880124005

DeLeon, I. G., Kahng, S., Rodriguez-Catter, V., Sveinsdóttir, I., & Sadler, C. (2003). Assessment of aberrant behavior maintained by wheelchair movement in a child with developmental disabilities. *Research in Developmental Disabilities, 24*, 381-390. doi: 10.1016/S0891-4222(03)00056-8

DeLeon, I. G., Neidert, P. L., Anders, B. M., & Rodriguez-Catter, V. (2001). Choices between positive and negative reinforcement during treatment for escape-maintained behavior. *Journal of Applied Behavior Analysis, 34*, 521–525. doi: 10.1901/jaba.2001.34-521

Derby, K. M., Fisher, W. W., Piazza, C. C., Wilke, A. E., & Johnson, W. (1998). The effects of noncontingent and contingent attention for self-injury, manding, and collateral responses. *Behavior Modification, 22*, 474-484. doi: 10.1177/01454455980224002

Derby, K. M., Wacker, D. P., Berg, W., DeRaad, A., Ulrich, S., Asmus, J. … Stoner, E. A. (1997). The long-term effects of functional communication training in home settings. *Journal of Applied Behavior Analysis, 30*, 507-531. doi: 10.1901/jaba.1997.30-507

Derby, K. M., Wacker, D. P., Sasso, G. M., Steege, M., Northup, J., Cigrand, K., & Asmus, J. (1992). Brief functional assessment techniques to evaluate aberrant behavior in an outpatient setting: A summary of 79 cases. *Journal of Applied Behavior Analysis, 25,* 713–722. doi: 10.1901/jaba.1992.25-713

Derosa, N. M., Fisher, W. W., & Steege, M. W. (2015). An evaluation of time in establishing operation on the effectiveness of functional communication training. *Journal of Applied Behavior Analysis, 48*, 115-130. doi: 10.1002/jaba.180

Dolezal, D. N., & Kurtz, P. F. (2010). Evaluation of combined-antecedent variables on functional analysis results and treatment of problem behavior in a school setting. *Journal of Applied Behavior Analysis, 43*, 309-314. doi: 10.1901/jaba.2010.43-309

Doughty, S. S., & Anderson, C. M. (2006). Effects of noncontingent reinforcement and functional communication training on problem behavior and mands. *Education and Treatment of Children, 29*, 23-50.

Doyle, N. M., DeRosa, N. M., & Roane, H. S. (2013). Development of a combined intervention to decrease problem behavior displayed by siblings with pervasive developmental disorder. *Journal of Developmental and Physical Disabilities, 25*, 91-104. doi: 10.1007/s10882-012-9305-1

Drasgow E., Halle, J. W., Ostrosky, M. M. (1998). Effects of differential reinforcement on the generalization of a replacement mand in three children with severe language delays. *Journal of Applied Behavior Analysis, 31,* 357–374. doi: 10.1901/jaba.1998.31-357

Dunlap, G., Ester, T., Langhans, S., & Fox, L. (2006). Functional communication training with toddlers in home environments. *Journal of Early Intervention, 28*, 81-96. doi: 10.1177/105381510602800201

Durand, V. M. (1993). Functional communication training using assistive devices: Effects on challenging behavior and affect. *Augmentative and Alternative Communication, 9*, 168-176. doi: 10.1080/07434619312331276571

Durand, V. M. (1999). Functional communication training using assistive devices: Recruiting natural communities of reinforcement. *Journal of Applied Behavior Analysis, 32*, 247-267. doi: 10.1901/jaba.1999.32-247

Durand, V. M., & Carr, E. G. (1987). Social influences on "self-stimulatory" behavior: Analysis and treatment application. *Journal of Applied Behavior Analysis, 20,* 119-132. doi: 10.1901/jaba.1987.20-119

Durand, V. M., & Carr, E. G. (1991). Functional communication training to reduce challenging behavior: Maintenance and application in new settings. *Journal of Applied Behavior Analysis, 24*, 251-264. doi: 10.1901/jaba.1991.24-251

Durand, V. M., & Carr, E. G. (1992). An analysis of maintenance following functional communication training. *Journal of Applied Behavior Analysis, 25*, 777-794. doi: 10.1901/jaba.1992.25-777

Durand, V. M. & Crimmins, D. B. (1987). Assessment and treatment of psychotic speech in an autistic child. *Journal of Autism and Developmental Disorders, 17,* 17-28. doi: 10.1007/bf01487257

Durand, V. M., & Kishi, G. (1987). Reducing severe behavior problems among persons with dual sensory impairments: An evaluation of a technical assistance model. *Research and Practice for Persons with Severe Disabilities, 12*, 2-10. doi: 10.1177/154079698701200102

Fahmie, T. A., Iwata, B. A., & Mead, S. C. (2016). Within-subject analysis of a prevention strategy for problem behavior. *Journal of Applied Behavior Analysis, 49*, 915-926. doi: 10.1002/jaba.343

Falcomata, T. S., Muething, C. S., Gainey, S., Hoffman, K., & Fragale, C. (2013). Further evaluations of functional communication training and chained schedules of reinforcement to treat multiple functions of challenging behavior. *Behavior Modification, 37*, 723-746. doi: 10.1177/0145445513500785

Falcomata, T. S., Muething, C. S., Silbaugh, B. C., Adami, S., Hoffman, K., Shpall, C., & Ringdahl, J. E. (2017). Lag schedules and functional communication training: Persistence of mands and relapse of problem behavior. *Behavior Modification, 42*, 314-334*.* doi: 10.1177/0145445517741475

Falcomata, T. S., Roane, H. S., Feeney, B. J., & Stephenson, K. M. (2010). Assessment and treatment of elopement maintained by access to stereotypy. *Journal of Applied Behavior Analysis, 43*, 513-517. doi: 10.1901/jaba.2010.43-513

Falcomata, T. S., Roane, H. S., Muething, C. S., Stephenson, K. M., & Ing, A. D. (2012). Functional communication training and chained schedules of reinforcement to treat challenging behavior maintained by terminations of activity interruptions. *Behavior Modification, 36*, 630-649. doi: 10.1177/0145445511433821

Falcomata, T. S., Shpall, C. S., Ringdahl, J. E., Ferguson, R. H., Wingate, H. V., & Swinnea, S. B. (2017). A comparison of high and low-proficiency mands during functional communication training across multiple functions of problem behavior. *Journal of Developmental and Physical Disabilities, 29*, 983-1002. doi: 10.1007/s10882-017-9571-z

Falcomata, T. S., Wacker, D. P., Ringdahl, J. E., Vinquist, K., & Dutt, A. (2013). An evaluation of generalization of mands during functional communication training. *Journal of Applied Behavior Analysis, 46*, 444-454. doi: 10.1002/jaba.37

Falcomata, T. S., White, P., Muething, C. S., & Fragale, C. (2012). A functional communication training and chained schedule procedure to treat challenging behavior with multiple functions. *Journal of Developmental and Physical Disabilities, 24*, 529-538. doi: 10.1007/s10882-012-9287-z

Fisher, W. W., Adelinis, J. D., Thompson, R. H., Worsdell, A. S., & Zarcone, J. R. (1998). Functional analysis and treatment of destructive behavior maintained by termination of “don't” (and symmetrical “do”) requests. *Journal of Applied Behavior Analysis, 31*, 339-356. doi: 10.1901/jaba.1998.31-339

Fisher, W. W., Adelinis, J. D., Volkert, V. M., Keeney, K. M., Neidert, P. L., & Hovanetz, A. (2005). Assessing preferences for positive and negative reinforcement during treatment of destructive behavior with functional communication training. *Research in Developmental Disabilities, 26*, 153-168. doi: 10.1016/j.ridd.2004.01.007

Fisher, W. W., Greer, B. D., Fuhrman, A. M., & Querim, A. C. (2015). Using multiple schedules during functional communication training to promote rapid transfer of treatment effects. *Journal of Applied Behavior Analysis, 48*, 713-733. doi: 10.1002/jaba.254

Fisher, W. W., Greer, B. D., Querim, A. C., & DeRosa, N. (2014). Decreasing excessive functional communication responses while treating destructive behavior using response restriction. *Research in Developmental Disabilities, 35*, 2614-2623. doi: 10.1016/j.ridd.2014.06.024

Fisher, W. W., Kuhn, D. E., & Thompson, R. H. (1998). Establishing discriminative control of responding using functional and alternative reinforcers during functional communication training. *Journal of Applied Behavior Analysis, 31*, 543-560. doi: 10.1901/jaba.1998.31-543

Fisher, W. W., Thompson, R. H., Hagopian, L. P., Bowman, L. G., & Krug, A. (2000). Facilitating tolerance of delayed reinforcement during functional communication training. *Behavior Modification, 24*, 3-29. doi: 10.1177/0145445500241001

Fisher, W., Piazza, C., Cataldo, M., Harrell, R., Jefferson, G., & Conner, R. (1993). Functional communication training with and without extinction and punishment. *Journal of Applied Behavior Analysis, 26*, 23-36. doi: 10.1901/jaba.1993.26-23

Flood, W. A., & Wilder, D. A. (2002). Antecedent assessment and assessment-based treatment of off-task behavior in a child diagnosed with attention deficit-hyperactivity disorder (ADHD). *Education and Treatment of Children, 25*, 331-338.

Franco, J. H., Lang, R. L., O'Reilly, M. F., Chan, J. M., Sigafoos, J., & Rispoli, M. (2009). Functional analysis and treatment of inappropriate vocalizations using a speech-generating device for a child with autism. *Focus on Autism and Other Developmental Disabilities, 24*, 146-155. doi: 10.1177/1088357609338380

Frea, W. D., & Hughes, C. (1997). Functional analysis and treatment of social-communicative behavior of adolescents with developmental disabilities. *Journal of Applied Behavior Analysis, 30,* 701-704. doi: 10.1901/jaba.1997.30-701

Fritz, J. N., Jackson, L. M., Stiefler, N. A., Wimberly, B. S., & Richardson, A. R. (2017). Noncontingent reinforcement without extinction plus differential reinforcement of alternative behavior during treatment of problem behavior. *Journal of Applied Behavior Analysis, 50*, 590-599. doi: 10.1002/jaba.395

Fuhrman, A. M., Fisher, W. W., & Greer, B. D. (2016). A preliminary investigation on improving functional communication training by mitigating resurgence of destructive behavior. *Journal of Applied Behavior Analysis, 49*, 884-899.doi: 10.1002/jaba.338

Fyffe, C. E., Kahng, S., Fittro, E., & Russell, D. (2004). Functional analysis and treatment of inappropriate sexual behavior. *Journal of Applied Behavior Analysis, 37*, 401-404. doi: 10.1901/jaba.2004.37-401

Gabor, A. M., Fritz, J. N., Roath, C. T., Rothe, B. R., & Gourley, D. A. (2016). Caregiver preference for reinforcement-based interventions for problem behavior maintained by positive reinforcement. *Journal of Applied Behavior Analysis, 49*, 215-227. doi: 10.1002/jaba.286

Gardner, R. M., Bird, F. L., Maguire, H., Carreiro, R., & Abenaim, N. (2003). Intensive positive behavior supports for adolescents with acquired brain injury: Long-term outcomes in community settings. *Journal of Head Trauma Rehabilitation, 18,* 52–74. doi: 10.1097/00001199-200301000-00007

Gerhardt, P. F., Weiss, M. J., & Delmolino, L. (2004). Treatment of severe aggression in an adolescent with autism: Non-contingent reinforcement and functional communication training. *The Behavior Analyst Today, 4*, 386-394. doi: 10.1037/h0100124

Ghaemmaghami, M., Hanley, G. P., & Jessel, J. (2016). Contingencies promote delay tolerance. *Journal of Applied Behavior Analysis, 49*, 548-575. doi: 10.1002/jaba.333

Gibson, J. L., Pennington, R. C., Stenhoff, D. M., & Hopper, J. S. (2010). Using desktop videoconferencing to deliver interventions to a preschool student with autism. *Topics in Early Childhood Special Education, 29*, 214-225. doi: 10.1177/0271121409352873

Goh, H.-L., Iwata, B. A., & DeLeon, I. G. (2000). Competition between noncontingent and contingent reinforcement schedules during response acquisition. *Journal of Applied Behavior Analysis, 33,* 195–205. doi: 10.1901/jaba.2000.33-195

Greer, B. D., Fisher, W. W., Saini, V., Owen, T. M., & Jones, J. K. (2016). Functional communication training during reinforcement schedule thinning: An analysis of 25 applications. *Journal of Applied Behavior Analysis, 49*, 105-121. doi: 10.1002/jaba.265

Grow, L. L., Kelley, M. E., Roane, H. S., & Shillingsburg, M. A. (2008). Utility of extinction-induced response variability for the selection of mands. *Journal of Applied Behavior Analysis, 41*, 15-24. doi: 10:1901/jaba.2008.41-15

Hagopian, L. P., Kuhn, S. A. C., Long, E. S., & Rush, K. S. (2005). Schedule thinning following communication training: Using competing stimuli to enhance tolerance to decrements in reinforcer density. *Journal of Applied Behavior Analysis, 38*, 177-193. doi: 10.1901/jaba.2005.43-04

Hagopian, L. P., Fisher, W. W., Sullivan, M. T., Acquisto, J., & LeBlanc, L. A. (1998). Effectiveness of functional communication training with and without extinction and punishment: A summary of 21 inpatient cases. *Journal of Applied Behavior Analysis, 31*, 211-235. doi: 10.1901/jaba.1998.31-211

Hagopian, L. P., Toole, L. M., Long, E. S., Bowman, L. G., & Lieving, G. A. (2004). A comparison of dense-to-lean and fixed lean schedules of alternative reinforcement and extinction. *Journal of Applied Behavior Analysis, 37*, 323-338. doi: 10.1901/jaba.2004.37-323

Hagopian, L. P., Wilson, D. M., & Wilder, D. A. (2001). Assessment and treatment of problem behavior maintained by escape from attention and access to tangible items. *Journal of Applied Behavior Analysis, 34*, 229-232. doi: 10.1901/jaba.2001.34-229

Hanley, G. P., Iwata, B. A., & Thompson, R. H. (2001). Reinforcement schedule thinning following treatment with functional communication training. *Journal of Applied Behavior Analysis, 34*, 17-38. doi: 10.1901/jaba.2001.34-17

Hanley, G. P., Jin, C. S., Vanselow, N. R., & Hanratty, L. A. (2014). Producing meaningful improvements in problem behavior of children with autism via synthesized analyses and treatments. *Journal of Applied Behavior Analysis, 47,* 16–36. doi: 10.1002/jaba.106

Hanley, G. P., Piazza, C. C., Fisher, W. W., & Maglieri, K. A. (2005). On the effectiveness of and preference for punishment and extinction components of function-based interventions. *Journal of Applied Behavior Analysis, 38*, 51-65. doi: 10.1901/jaba.2005.6-04

Hanley, G. P., Piazza, C. C., Fisher, W. W., Contrucci, S. A., & Maglieri, K. A. (1997). Evaluation of client preference for function-based treatment packages. *Journal of Applied Behavior Analysis, 30*, 459-473. doi: 10.1901/jaba.1997.30-459

Haq, S. S., Machalicek, W., Garbacz, S. A., & Drew, C. (2017). Employing a fixed-lean multiple schedule in the treatment of challenging behavior for children with autism spectrum disorder. *Behavior Modification,* *42*, 610-633. doi: 10.1177/0145445517743206

Harding, J. W., Wacker, D. P., Berg, W. K., Lee, J. F., & Dolezal, D. (2009). Conducting functional communication training in home settings: A case study and recommendations for practitioners. *Behavior Analysis in Practice, 2*,21-33. doi: 10.1007/BF03391734

Harding, J. W., Wacker, D. P., Berg, W. K., Winborn-Kemmerer, L., & Lee, J. F. (2009). Evaluation of choice allocation between positive and negative reinforcement during functional communication training with young children. *Journal of Developmental and Physical Disabilities, 21*, 443-456. doi: 10.1007/s10882-009-9155-7

Harding, J. W., Wacker, D. P., Berg, W. K., Winborn-Kemmerer, L., Lee, J. F., & Ibrahimovic, M. (2009). Analysis of multiple manding topographies during functional communication training. *Education and Treatment of Children, 32*, 21-36. doi: 10.1353/etc.0.0045

Harding, J., Wacker, D. P., Berg, W. K., Barretto, A., & Ringdahl, J. (2005). Evaluation of relations between specific antecedent stimuli and self-injury during functional analysis conditions. *American Journal on Intellectual and Developmental Disabilities, 110*, 205-215. doi: 10.1352/0895-8017(2005)110<205:EORBSA>2.0.CO;2

Hausman, N., Kahng, S., Farrell, E., & Mongeon, C. (2009). Idiosyncratic functions: Severe problem behavior maintained by access to ritualistic behaviors. *Education and Treatment of Children, 32,* 77–87. doi: 10.1353/etc.0.0051

Hines, E., & Simonsen, B. (2008). The effects of picture icons on behavior for a young student with autism. *Beyond Behavior, 18*, 9-17.

Horner, R. H., & Budd, C. M. (1985). Acquisition of manual sign use: Collateral reduction of maladaptive behavior, and factors limiting generalization. *Education and Training in Autism and Developmental Disabilities, 20,* 39-47.

Horner, R. H., & Day, H. M. (1991). The effects of response efficiency on functionally equivalent competing behaviors. *Journal of Applied Behavior Analysis, 24*, 719-732. doi: 10.1901/jaba.1991.24-719

Horner, R. H., Sprague, J. R., O’Brien, M., & Heathfield, L. T. (1990). The role of response efficiency in the reduction of problem behaviors through functional equivalence training: A case study. *Research and Practice for Persons with Severe Disabilities, 15*, 91-97. doi: 10.1177/154079699001500205

Hunt, P., Alwell, M., & Goetz, L. (1988). Acquisition of conversation skills and the reduction of inappropriate social interaction behaviors. *Research and Practice for Persons with Severe Disabilities, 13,* 20–27. doi: 10.1177/154079698801300103

Jarmolowicz, D. P., DeLeon, I. G., & Kuhn, S. A. C. (2009). Functional communication during signaled reinforcement and/or extinction. *Behavioral Interventions, 24*, 265-273. doi: 10.1002/bin.288

Jensen, C. C., McConnachie, G., & Pierson, T. (2001). Long-term multicomponent intervention to reduce severe problem behavior: A 63-month evaluation. *Journal of Positive Behavior Interventions, 3*, 225-236. doi: 10.1177/109830070100300404

Kahng, S., Hendrickson, D. J., & Vu, C. P. (2000). Comparison of single and multiple functional communication training responses for the treatment of problem behavior. *Journal of Applied Behavior Analysis, 33*, 321-324. doi: 10.1901/jaba.2000.33-321

Kahng, S., Iwata, B. A., DeLeon, I. G., & Worsdell, A. S. (1997). Evaluation of the “control over reinforcement” component in functional communication training. *Journal of Applied Behavior Analysis, 30*, 267-277. doi: 10.1901/jaba.1997.30-267

Kelley, M. E., Lerman, D. C., & Van Camp, C. M. (2002). The effects of competing reinforcement schedules on the acquisition of functional communication. *Journal of Applied Behavior Analysis, 35*, 59-63. doi: 10.1901/jaba.2002.35-59

Kemp, D. C., & Carr, E. G. (1995). Reduction of severe problem behavior in community employment using an hypothesis-driven multicomponent intervention approach. *Research and Practice for Persons with Severe Disabilities, 20*, 229-247. doi: 10.1177/154079699602000401

Kennedy, C. H., Meyer, K. A., Knowles, T., & Shukla, S. (2000). Analyzing the multiple functions of stereotypical behavior for students with autism: Implications for assessment and treatment. *Journal of Applied Behavior Analysis, 33*, 559-571. doi: 10.1901/jaba.2000.33-559

Koegel, L. K., Stiebel, D., & Koegel, R. L. (1998). Reducing aggression in children with autism toward infant or toddler siblings. *Research and Practice for Persons with Severe Disabilities, 23*, 111-118. doi: 10.2511/rpsd.23.2.111

Kuhn, D. E., Chirighin, A. E., & Zelenka, K. (2010). Discriminated functional communication: A procedural extension of functional communication training. *Journal of Applied Behavior Analysis, 43*, 249-264. doi: 10.1901/jaba.2010.43-249

Kuhn, D. E., Hardesty, S. L., & Sweeney, N. M. (2009). Assessment and treatment of excessive straightening and destructive behavior in an adolescent diagnosed with autism. *Journal of Applied Behavior Analysis, 42*, 355–360. doi: 10.1901/jaba.2009.42-355

Lalli, J. S., Browder, D. M., Mace, F. C., & Brown, D. K (1993). Teacher use of descriptive analysis data to implement interventions to decrease students' problem behaviors. *Journal of Applied Behavior Analysis, 26,* 227-238. doi: 10.1901/jaba.1993.26-227

Lalli, J. S., Casey, S., & Kates, K. (1995). Reducing escape behavior and increasing task completion with functional communication training, extinction, and response chaining. *Journal of Applied Behavior Analysis, 28*, 261-268. doi: 10.1901/jaba.1995.28-261

Lalli, J. S., Mace, F. C., Wohn, T., & Livezey, K. (1995). Identification and modification of a response-class hierarchy. *Journal of Applied Behavior Analysis, 28,* 551–559. doi: 10.1901/jaba.1995.28-551

Lambert, J. M., Bloom, S. E., & Irvin, J. (2012). Trial-based functional analysis and functional communication training in an early childhood setting. *Journal of Applied Behavior Analysis, 45*, 579-584. doi: 10.1901/jaba.2012.45-579

Lang, R., Davenport, K., Britt, C., Ninci, J., Garner, J., & Moore, M. (2013). Functional analysis and treatment of diurnal bruxism. *Journal of Applied Behavior Analysis, 46*, 322-327. doi: 10.1002/jaba.5

Langdon, N. A., Carr, E. G., & Owen-DeSchryver, J. S. (2008). Functional analysis of precursors for serious problem behavior and related intervention. *Behavior Modification, 32*, 804-827. doi: 10.1177/0145445508317943

LeBlanc, L. A., Hagopian, L. P., Marhefka, J. M., & Wilke, A. E. (2001). Effects of therapist gender and type of attention on assessment and treatment of attention-maintained destructive behavior. *Behavioral Interventions, 16*, 39-57. doi: 10.1002/bin.73

Lee, S., & Harrington, R. G. (2016). Differential effects of three time-delayed procedures on temper tantrums in a child with mild developmental disabilities. *National Teacher Education Journal, 9*, 95-102.

Lehardy, R. K., Lerman, D. C., Evans, L. M., O'Connor, A., & LeSage, D. L. (2013). A simplified methodology for identifying the function of elopement. *Journal of Applied Behavior Analysis, 46*, 256-270. doi: 10.1002/jaba.22

Leon, Y., Lazarchick, W. N., Rooker, G. W., & DeLeon, I. G. (2013). Assessment of problem behavior evoked by disruption of ritualistic toy arrangements in a child with autism. *Journal of Applied Behavior Analysis, 46*, 507-511. doi: 10.1002/jaba.41

Lindauer, S. E., Zarcone, J. R., Richman, D. M., & Schroeder, S. R. (2002). A comparison of multiple reinforcer assessments to identify the function of maladaptive behavior. *Journal of Applied Behavior Analysis, 35*, 299-303. doi: 10.1901/jaba.2002.35-299

Lucyshyn, J. M., Albin, R. W., & Nixon, C. D. (1997). Embedding comprehensive behavioral support in family ecology: An experimental, single-case analysis. *Journal of Consulting and Clinical Psychology, 65,* 241–251.­­­ doi: 10.1037//0022-006x.65.2.241

Mace, F. C., & Lalli, J. S. (1991). Linking descriptive and experimental analyses in the treatment of bizarre speech. *Journal of Applied Behavior Analysis, 24,* 553–562. doi: 10.1901/jaba.1991.24-553

Mace, F. C., McComas, J. J., Mauro, B. C., Progar, P. R., Taylor, B., Ervin, R., & Zangrillo, A. N. (2010). Differential reinforcement of alternative behavior increases resistance to extinction: Clinical demonstration, animal modeling, and clinical test of one solution. *Journal of the Experimental Analysis of Behavior, 93,* 349–367. doi: 10.1901/jeab.2010.93-349

Machalicek, W., Lequia, J., Pinkelman, S., Knowles, C., Raulston, T., Davis, T., & Alresheed, F. (2016). Behavioral telehealth consultation with families of children with autism spectrum disorder. *Behavioral Interventions, 31*, 223-250. doi: 10.1002/bin.1450

Mancil, G. R., Conroy, M. A., & Haydon, T. F. (2009). Effects of a modified milieu therapy intervention on the social communicative behaviors of young children with autism spectrum disorders. *Journal of Autism and Developmental Disorders, 39*, 149-163. doi: 10.1007/s10803-008-0613-3

Mancil, G. R., Conroy, M. A., Nakao, T., & Alter, P. J. (2006). Functional communication training in the natural environment: A pilot investigation with a young child with autism spectrum disorder. *Education and Treatment of Children, 29*, 615-633.

Mann, A. J., & Mueller, M. M. (2009). False positive functional analysis results as a contributor of treatment failure during functional communication training. *Education and Treatment of Children, 32*, 121-149. doi: 10.1353/etc.0.0044

Marcus, B. A., & Vollmer, T. R. (1995). Effects of differential negative reinforcement on disruption and compliance. *Journal of Applied Behavior Analysis, 28*, 229-230. doi: 10.1901/jaba.1995.28-229

Marcus, B. A., Swanson, V., & Vollmer, T. R. (2001). Effects of parent training on parent and child behavior using procedures based on functional analyses. *Behavioral Interventions, 16,* 87–104. doi: 10.1002/bin.87

Marcus, B. A., & Vollmer, T. R. (1996). Combining noncontingent reinforcement (NCR) and differential reinforcement schedules as treatment for aberrant behavior. *Journal of Applied Behavior Analysis, 29,* 43–51. doi: 10.1901/jaba.1996.29-43

Marsteller, T. M., & St. Peter, C. C. (2014). Effects of fixed-time reinforcement schedules on resurgence of problem behavior. *Journal of Applied Behavior Analysis, 47,* 455–469. doi: 10.1002/jaba.134

Martin, C. A., Drasgow, E., Halle, J. W., & Brucker, J. M. (2005). Teaching a child with autism and severe language delays to reject: Direct and indirect effects of functional communication training. *Educational Psychology, 25*, 287-304. doi: 10.1080/0144341042000301210

McConnachie, G., & Carr, E. G. (1997). The effects of child behavior problems on the maintenance of intervention fidelity. *Behavior Modification, 21*, 123-158. doi: 10.1177/01454455970212001

Meyer, K. A. (1999). Functional analysis and treatment of problem behavior exhibited by elementary school children. *Journal of Applied Behavior Analysis, 32,* 229-232. doi: 10.1901/jaba.1999.32-229

Mildon, R. L., Moore, D. W., & Dixon, R. S. (2004). Combining noncontingent escape and functional communication training as a treatment for negatively reinforced disruptive behavior. *Journal of Positive Behavior Interventions, 6*, 92-102. doi: 10.1177/10983007040060020401

Moes, D. R., & Frea, W. D. (2000). Using family context to inform intervention planning for the treatment of a child with autism. *Journal of Positive Behavior Interventions, 2,* 40–46. doi: 10.1177/109830070000200106

Moes, D. R., & Frea, W. D. (2002). Contextualized behavioral support in early intervention for children with autism and their families. *Journal of Autism and Developmental Disorders, 32*, 519-533. doi: 10.1023/A:1021298729297

Moore, T. R., Gilles, E., McComas, J. J., & Symons, F. J. (2010). Functional analysis and treatment of self-injurious behaviour in a young child with traumatic brain injury. *Brain Injury, 24*, 1511-1518. doi: 10.3109/02699052.2010.523043

Najdowski, A. C., Wallace, M. D., Ellsworth, C. L., MacAleese, A. N., & Cleveland, J. M. (2008). Functional analyses and treatment of precursor behavior. *Journal of Applied Behavior Analysis, 41*, 97-105. doi: 10.1901/jaba.2008.41-97

Napolitano, D. A., Blakkman, L. A., Kohl, L. B., Vallese, H. M., & McAdam, D. B. (2007). The use of functional communication training to reduce pica. *The Journal of Speech and Language Pathology – Applied Behavior Analysis, 2*, 25-31. doi: 10.1037/h0100206

Neidert, P. L., Iwata, B. A., & Dozier, C. L. (2005). Treatment of multiply controlled problem behavior with procedural variations of differential reinforcement. *Exceptionality, 13,* 45-53. doi: 10.1207/s15327035ex1301_6

Northup, J., Fisher, W., Kahng, S., Harrell, R., & Kurtz, P. (1997). An assessment of the necessary strength of behavioral treatments for severe behavior problems. *Journal of Developmental and Physical Disabilities, 9,* 1–16.

Northup, J., Wacker, D. P., Berg, W. K., Kelly, L., Sasso, G., & DeRaad, A. (1994). The treatment of severe behavior problems in school settings using a technical assistance model. *Journal of Applied Behavior Analysis, 27,* 33-47. doi: 10.1901/jaba.1994.27-33

Northrup, J., Wacker, D., Sasso, G., Steege, M., Cigrand, K., Cook, J., & DeRaad, A. (1991). A brief functional analysis of aggressive and alternative behavior in an outclinic setting. *Journal of Applied Behavior Analysis, 24,* 509–522. doi: 10.1901/jaba.1991.24-509

O' Neill, R. E., & Sweetland-Baker, M. (2001). Brief report: An assessment of stimulus generalization and contingency effects in functional communication training with two students with autism. *Journal of Autism and Developmental Disorders, 31*, 235-240.

Olive, M. L., Lang, R. B., & Davis, T. N. (2008). An analysis of the effects of functional communication and a voice output communication aid for a child with autism spectrum disorder. *Research in Autism Spectrum Disorders, 2*, 223-236. doi: 10.1016/j.rasd.2007.06.002

Pane, H. M., Sidener, T. M., Vladescu, J. C., & Nirgudkar, A. (2015). Evaluating function-based social stories™ with children with autism. *Behavior Modification, 39*, 912-931. doi: 10.1177/0145445515603708

Peck, S. M., Wacker, D. P., Berg, W. K., Cooper, L. J, Brown, K. A., Richman, D., McComas, J. J., … Millard, T. (1996). Choice-making treatment of young children's severe behavior problems. *Journal of Applied Behavior Analysis, 29*, 263-290. doi: 10.1901/jaba.1996.29-263

Perrin, C. J., Perrin, S. H., Hill, E. A., & DiNovi, K. (2008). Brief functional analysis and treatment of elopement in preschoolers with autism. *Behavioral Interventions, 23,* 87–95. doi: 10.1002/bin.256

Perry, A. C., & Fisher, W. W. (2001). Behavioral economic influences on treatments designed to decrease destructive behavior. *Journal of Applied Behavior Analysis, 34,* 211–215. doi: 10.1901/jaba.2001.34-211

Peterson, S. M., Frieder, J. E., Smith, S. L., Quigley, S. P., & Van Norman, R. K. (2009). The effects of varying quality and duration of reinforcement on mands to work, mands for break, and problem behavior. *Education and Treatment of Children, 32*, 605-630. doi: 10.1353/etc.0.0075

Peterson, S. M. P., Caniglia, C., Royster, A. J., Macfarlane, E., Plowman, K., Baird, S. J., & Wu, N. (2005). Blending functional communication training and choice making to improve task engagement and decrease problem behaviour. *Educational Psychology, 25*, 257-274. doi: 10.1080/0144341042000301193

Piazza, C. C., Bowman, L. G., Contrucci, S. A., Delia, M., D., Adelinis, J. D., & Goh, H.-L. (1999). An evaluation of the properties of attention as reinforcement for destructive and appropriate behavior. *Journal of Applied Behavior Analysis, 32,* 437-449. doi: 10.1901/jaba.1999.32-437

Piazza, C. C., Hanley, G. P., Bowman, L. G., Ruyter, J. M., Lindauer, S. E., & Saiontz, D. M. (1997). Functional analysis and treatment of elopement. *Journal of Applied Behavior Analysis, 30,* 653–672. doi: 10.1901/jaba.1997.30-653

Pipkin, C. S. P., Vollmer, T. R., & Sloman, K. N. (2010). Effects of treatment integrity failures during differential reinforcement of alternative behavior: A translational model. *Journal of Applied Behavior Analysis, 43,* 47–70. doi: 10.1901/jaba.2010.43-47

Quigley, S. P., Peterson, L., Frieder, J. E., & Peterson, S. (2011). Effects of a weighted vest on problem behaviors during functional analyses in children with pervasive developmental disorders. *Research in Autism Spectrum Disorders, 5*, 529-538. doi: 10.1016/j.rasd.2010.06.019

Radstaake, M., Didden, R., Lang, R., O’Reilly, M., Sigafoos, J., Lancioni, G. E., . . . Curfs, L. M. G. (2013). Functional analysis and functional communication training in the classroom for three children with Angelman syndrome. *Journal of Developmental and Physical Disabilities, 25*, 49-63. doi: 10.1007/s10882-012-9302-4

Radstaake, M., Didden, R., Oliver, C., Allen, D., & Curfs, L. M. G. (2012). Functional analysis and functional communication training in individuals with Angelman syndrome. *Developmental Neurorehabilitation, 15*, 91-104. doi: 10.3109/17518423.2011.651537

Randall, K. R., Lambert, J. M., Matthews, M. P., & Houchins-Juarez, N. J. (2017). Individualized levels system and systematic stimulus pairing to reduce multiply controlled aggression of a child with autism spectrum disorder. *Behavior Modification, 42*, 422-440. doi: 10.1177/0145445517741473

Richman, D. M., Wacker, D. P., & Winborn, L. (2001). Response efficiency during functional communication training: Effects of effort on response allocation. *Journal of Applied Behavior Analysis, 34*, 73-76. doi: 10.1901/jaba.2001.34-73

Ringdahl, J. E., Berg, W. K., Wacker, D. P., Ryan, S., Ryan, A., Crook, K., & Molony, M. (2016). Further demonstrations of individual preference among mand modalities during functional communication training. *Journal of Developmental and Physical Disabilities, 28*, 905-917. doi: 10.1007/s10882-016-9518-9

Ringdahl, J. E., Falcomata, T. S., Christensen, T. J., Bass-Ringdahl, S. M., Lentz, A., Dutt, A., & Schuh-Claus, J. (2009). Evaluation of a pre-treatment assessment to select mand topographies for functional communication training. *Research in Developmental Disabilities, 30*, 330-341. doi: 10.1016/j.ridd.2008.06.002

Rispoli, M., Camargo, S., Machalicek, W., Lang, R., & Sigafoos, J. (2014). Functional communication training in the treatment of problem behavior maintained by access to rituals. *Journal of Applied Behavior Analysis, 47*, 580-593. doi: 10.1002/jaba.130

Roane, H. S., Fisher, W. W., Sgro, G. M., Falcomata, T. S., & Pabico, R. R. (2004). An alternative method of thinning reinforcer delivery during differential reinforcement. *Journal of Applied Behavior Analysis, 37,* 213–218. doi: 10.1901/jaba.2004.37-213

Robinson, L. A., & Owens, R. E. (1995).Clinical notes: Functional augmentative communication and positive behavior change. *Augmentative and Alternative Communication, 11*, 207-211. doi: 10.1080/07434619512331277339

Rooker, G. W., Jessel, J., Kurtz, P. F., & Hagopian, L. P. (2013). Functional communication training with and without alternative reinforcement and punishment: An analysis of 58 applications. *Journal of Applied Behavior Analysis, 46*, 708-722. doi: 10.1002/jaba.76

Roscoe, E. M., Schlichenmeyer, K. J., & Dube, W. V. (2015). Functional analysis of problem behavior: A systematic approach for identifying idiosyncratic variables. *Journal of Applied Behavior Analysis, 48*, 289-314. doi: 10.1002/jaba.201

Ross, D. E. (2002). Replacing faulty conversational exchanges for children with autism by establishing a functionally equivalent alternative response. *Education and Training in Autism and Developmental Disabilities, 37*, 343-62.

Sasso, G. M., Reimers, T. M., Cooper, L. J., Wacker, D., Berg, W., Steege, M., Kelly, L., & Allaire, A. (1992). Use of descriptive and experimental analyses to identify the functional properties of aberrant behavior in school settings. *Journal of Applied Behavior Analysis, 25,* 809-821. doi: 10.1901/jaba.1992.25-809

Scalzo, R., Henry, K., Davis, T. N., Amos, K., Zoch, T., Turchan, S., & Wagner, T. (2015). Evaluation of interventions to reduce multiply controlled vocal stereotypy. *Behavior Modification, 39*, 496-509. doi: 10.1177/0145445515573986

Scheithauer, M. C., Mevers, J. E. L., Call, N. A., & Shrewsbury, A. N. (2017). Using a test for multiply-maintained self-injury to develop function-based treatments. *Journal of Developmental and Physical Disabilities, 29*, 443-460. doi: 10.1007/s10882-017-9535-3

Schieltz, K. M., Wacker, D. P., Harding, J. W., Berg, W. K., Lee, J. F., & Dalmau, Y. C. P. (2010). An evaluation of manding across functions prior to functional communication training. *Journal of Developmental and Physical Disabilities, 22*, 131-147. doi: 10.1007/s10882-009-9181-5

Schieltz, K. M., Wacker, D. P., Harding, J. W., Berg, W. K., Lee, J. F., Dalmau, Y. C. P., . . . Ibrahimović, M. (2011). Indirect effects of functional communication training on non-targeted disruptive behavior. *Journal of Behavioral Education, 20*, 15-32. doi: 10.1007/s10864-011-9119-8

Schindler, H. R., & Horner, R. H. (2005). Generalized reduction of problem behavior of young children with autism: Building trans-situational interventions. *American Journal on Intellectual and Developmental Disabilities, 110*, 36-47. doi: 10.1352/0895-8017(2005)110<36:GROPBO>2.0.CO;2

Schmidt, J. D., Drasgow, E., Halle, J. W., Martin, C. A., & Bliss, S. A. (2014). Discrete-trial functional analysis and functional communication training with three individuals with autism and severe problem behavior. *Journal of Positive Behavior Interventions, 16*, 44-55. doi: 10.1177/1098300712470519

Shamlian, K. D., Fisher, W. W., Steege, M. W., Cavanaugh, B. M., Samour, K., & Querim, A. C. (2016). Evaluation of multiple schedules with naturally occurring and therapist-arranged discriminative stimuli following functional communication training. *Journal of Applied Behavior Analysis, 49*, 228-250. doi: 10.1002/jaba.293

Shirley, M. J., Iwata, B. A., Kahng, S., Mazaleski, J. L., & Lerman, D. C. (1997). Does functional communication training compete with ongoing contingencies of reinforcement? An analysis during response acquisition and maintenance. *Journal of Applied Behavior Analysis, 30*, 93-104. doi: 10.1901/jaba.1997.30-93

Shukla, S., & Albin, R. W. (1996). Effects of extinction alone and extinction plus functional communication training on covariation of problem behaviors. *Journal of Applied Behavior Analysis, 29*, 565-568. doi: 10.1901/jaba.1996.29-565

Shukla-Mehta, S., & Albin, R. W. (2003). From hypotheses to interventions: Applied challenges of intervening with escalating sequences of problem behavior. *The Behavior Analyst Today, 4,* 271-288. doi: 10.1037/h0100018

Shukla-Mehta, S., & Albin, R. W. (2005). Understanding intra-response class covariation from the matching theory perspective. *Journal of Early and Intensive Behavior Intervention, 2*, 268-281. doi: 10.1037/h0100320

Sigafoos, J., & Meikle, B. (1996). Functional communication training for the treatment of multiply determined challenging behavior. *Behavior Modification, 20*, 60-84. doi: 10.1177/01454455960201003

Slaton, J. D., Hanley, G. P., & Raftery, K. J. (2017). Interview-informed functional analyses: A comparison of synthesized and isolated components. *Journal of Applied Behavior Analysis, 50*, 252-277. doi: 10.1002/jaba.384

Sprague, J. R., & Horner, R. H. (1992). Covariation within functional response classes: Implications for treatment of severe problem behavior. *Journal of Applied Behavior Analysis, 25,* 735–745. doi: 10.1901/jaba.1992.25-735

Steege, M. W., Wacker, D. P., Cigrand, K. C., Berg, W. K., Novak, C. G., Reimers, T. M., … DeRaad, A. (1990). Use of negative reinforcement in the treatment of self-injurious behavior. *Journal of Applied Behavior Analysis, 23*, 459–467. doi: 10.1901/jaba.1990.23-459

Stevenson, M. T., Ghezzi, P. M., & Valenton, K. G. (2015). FCT and delay fading for elopement with a child with autism. *Behavior Analysis in Practice, 9*, 169-173. doi: 10.1007/s40617-015-0089-5

Stokes, J. V., & Luiselli, J. K. (2009). Applied behavior analysis assessment and intervention for health: Threatening self-injury (rectal picking) in an adult with Prader-Willi syndrome. *Clinical Case Studies, 8*, 38-47. doi: 10.1177/1534650108327011

Suess, A. N., Romani, P. W., Wacker, D. P., Dyson, S. M., Kuhle, J. L., Lee, J. F., . . . Waldron, D. B. (2014). Evaluating the treatment fidelity of parents who conduct in-home functional communication training with coaching via telehealth. *Journal of Behavioral Education, 23*, 34-59. doi: 10.1007/s10864-013-9183-3

Suess, A. N., Wacker, D. P., Schwartz, J. E., Lustig, N., & Detrick, J. (2016). Preliminary evidence on the use of telehealth in an outpatient behavior clinic. *Journal of Applied Behavior Analysis, 49*, 686-692. doi: 10.1002/jaba.305

Symons, F. J., Fox, N. D., & Thompson, T. (1998). Functional communication training and naltrexone treatment of self-injurious behaviour: An experimental case report. *Journal of Applied Research in Intellectual Disabilities, 11*, 273-292. doi: 10.1111/j.1468-3148.1998.tb00067.x

Tait, K., Sigafoos, J., Woodyatt, G., O'Reilly, M. F., & Lancioni, G. E. (2004). Evaluating parent use of functional communication training to replace and enhance prelinguistic behaviours in six children with developmental and physical disabilities. *Disability and Rehabilitation, 26*, 1241-1254. doi: 10.1080/09638280412331280253

Tarbox, R. S. F., Wallace, M. D., & Williams, L. (2003). Assessment and treatment of elopement: A replication and extension. *Journal of Applied Behavior Analysis, 36,* 239-244. doi: 10.1901/jaba.2003.36-239

Thompson, R. H., Fisher, W. W., Piazza, C. C., & Kuhn, D. E. (1998). The evaluation and treatment of aggression maintained by attention and automatic reinforcement. *Journal of Applied Behavior Analysis, 31*, 103-116. doi: 10.1901/jaba.1998.31-103

Tiger, J. H., Fisher, W. W., Toussaint, K. A., & Kodak, T. (2009). Progressing from initially ambiguous functional analyses: Three case examples. *Research in Developmental Disabilities, 30,* 910–926. doi: 10.1016/j.ridd.2009.01.005

Tincani, M. J., Castrogiavanni, A., & Axelrod, S. (1999). A comparison of the effectiveness of brief versus traditional functional analyses. *Research in Developmental Disabilities, 20*, 327-338. doi: 10.1016/S0891-4222(99)00014-1

Torelli, J. N., Lambert, J. M., Da Fonte, M. A., Denham, K. N., Jedrzynski, T. M., & Houchins-Juarez, N. J. (2016). Assessing acquisition of and preference for mand topographies during functional communication training. *Behavior Analysis in Practice, 9*, 165-168. doi: 10.1007/s40617-015-0083-y

Umbreit, J. (1996). Functional analysis of disruptive behavior in an inclusive classroom. *Journal of Early Intervention, 20*, 18-29. doi: 10.1177/105381519602000104

Volkert, V. M., Lerman, D. C., Call, N. A., & Trosclair-Lasserre, N. (2009). An evaluation of resurgence during treatment with functional communication training. *Journal of Applied Behavior Analysis, 42*, 145-160. doi: 10.1901/jaba.2009.42-145

Vollmer, T. R., Borrero, J. C., Lalli, J. S., & Daniel, D. (1999). Evaluating self-control and impulsivity in children with severe behavior disorders. *Journal of Applied Behavior Analysis, 32*, 451-466. doi: 10.1901/jaba.1999.32-451

Vollmer, T. R., Northup, J., Ringdahl, J. E., LeBlanc, L. A., & Chauvin, T. M. (1996). Functional analysis of severe tantrums displayed by children with language delays: An outclinic assessment. *Behavior Modification, 20,* 97–115. doi: 10.1177/01454455960201005

Vollmer, T. R., Roane, H. S., Ringdahl, J. E., & Marcus, B. A. (1999). Evaluating treatment challenges with differential reinforcement of alternative behavior. *Journal of Applied Behavior Analysis, 32,* 9-23. doi: 10.1901/jaba.1999.32-9

Vollmer, T. R., & Vorndran, C. M. (1998). Assessment of self-injurious behavior maintained by access to self-restraint materials. *Journal of Applied Behavior Analysis, 31*, 647-650. doi: 10.1901/jaba.1998.31-647

Wacker, D. P., Berg, W. K., Harding, J. W., Barretto, A., Rankin, B., & Ganzer, J. (2005). Treatment effectiveness, stimulus generalization, and acceptability to parents of functional communication training. *Educational Psychology, 25*, 233-256. doi: 10.1080/0144341042000301184

Wacker, D. P., Harding, J. W., & Berg, W. K. (2008). Evaluation of mand-reinforcer relations following long-term functional communication training. *The Journal of Speech and Language Pathology - Applied Behavior Analysis, 3*, 25-35. doi: 10.1037/h0100229

Wacker, D. P., Harding, J. W., Berg, W. K., Lee, J. F., Schieltz, K. M., Padilla, Y. C., . . . Shahan, T. A. (2011). An evaluation of persistence of treatment effects during long-term treatment of destructive behavior. *Journal of the Experimental Analysis of Behavior, 96*, 261-282. doi: 10.1901/jeab.2011.96-261

Wacker, D. P., Harding, J. W., Morgan, T. A., Berg, W. K., Schieltz, K. M., Lee, J. F., & Padilla, Y. C. (2013). An evaluation of resurgence during functional communication training. *The Psychological Record, 63*, 3-20. doi: 10.11133/j.tpr.2013.63.1.001

Wacker, D. P., Lee, J. F., Dalmau, Y. C. P., Kopelman, T. G., Lindgren, S. D., Kuhle, J., . . . Waldron, D. B. (2013). Conducting functional communication training via telehealth to reduce the problem behavior of young children with autism. *Journal of Developmental and Physical Disabilities, 25*, 35-48. doi: 10.1007/s10882-012-9314-0

Wacker, D. P., Steege, M. W., Northup, J., Sasso, G., Berg, W., Reimers, T., …. Donn, L. (1990). A component analysis of functional communication training across three topographies of severe behavior problems. *Journal of Applied Behavior Analysis, 23*, 417-429. doi: 10.1901/jaba.1990.23-417

Winborn, L., Wacker, D. P., Richman, D. M., Asmus, J., & Geier, D. (2002). Assessment of mand selection for functional communication training packages. *Journal of Applied Behavior Analysis, 35*, 295-298. doi: 10.1901/jaba.2002.35-295

Winborn-Kemmerer, L., Ringdahl, J. E., Wacker, D. P., & Kitsukawa, K. (2009). A demonstration of individual preference for novel mands during functional communication training. *Journal of Applied Behavior Analysis, 42*, 185-189. doi: 10.1901/jaba.2009.42-185

Winborn-Kemmerer, L., Wacker, D. P., Harding, J., Boelter, E., Berg, W., & Lee, J. (2010). Analysis of mand selection across different stimulus conditions. *Education and Treatment of Children, 33*, 49-64. doi: 10.1353/etc.0.0086

Worsdell, A. S., Iwata, B. A., Hanley, G. P., Thompson, R. H., & Kahng, S. (2000). Effects of continuous and intermittent reinforcement for problem behavior during functional communication training. *Journal of Applied Behavior Analysis, 33*, 167-179. doi: 10.1901/jaba.2000.33-167

Wu, Y.-P., Mirenda, P., Wang, H.-P., & Chen, M.-C. (2010). Assessment and treatment of stereotypic vocalizations in a Taiwanese adolescent with autism: A case study. *International Journal of Special Education, 25*, 160-167. doi: 10.1007/bf03393110
